# Supplementary material
Source: publisher site journal article supplement (https://www.degruyterbrill.com/publication/isbn/9783110336061/downloadAsset/9783110336061_Inhaltsverzeichnis.pdf)
Supplement: Supplementary file 1 [file 9783110336061_Inhaltsverzeichnis.pdf]

# Inhalt

---

|                                                |      |
|------------------------------------------------|------|
| Geleitwort von Prof. Dr. Reinhard Burger ..... | V    |
| Geleitwort von Pascal Strupler .....           | VII  |
| Vorwort zur zweiten Auflage .....              | IX   |
| Vorwort zur ersten Auflage .....               | XI   |
| Autoren- und Mitarbeiterverzeichnis .....      | XIII |

## **1 Public Health: Konzepte, Disziplinen und Handlungsfelder**

|       |                                                |    |
|-------|------------------------------------------------|----|
| 1.1   | Definition .....                               | 1  |
| 1.2   | Geschichtliche Notizen .....                   | 3  |
| 1.3   | Zentrale Konzepte und Themen .....             | 7  |
| 1.3.1 | Gesundheit und Krankheit .....                 | 7  |
| 1.3.2 | Gesundheitliche Ungleichheiten .....           | 9  |
| 1.4   | Die Disziplinen der Public Health .....        | 13 |
| 1.5   | Ansatzpunkte der Prävention .....              | 15 |
| 1.5.1 | Primär-, Sekundär- und Tertiärprävention ..... | 15 |
| 1.5.2 | Bevölkerungs- und Hochrisikostrategie .....    | 16 |
| 1.5.3 | Das Präventionsparadox .....                   | 18 |
| 1.6   | Public-Health-Ethik .....                      | 20 |
| 1.7   | Public Health Genomics .....                   | 22 |

## **2 Public-Health-Methoden**

|       |                                                                  |    |
|-------|------------------------------------------------------------------|----|
| 2.1   | Epidemiologie .....                                              | 27 |
| 2.1.1 | Die Rolle der Epidemiologie in Public Health .....               | 27 |
| 2.1.2 | Epidemiologische Verfahren zum Messen und Vergleichen .....      | 30 |
| 2.1.3 | Assoziationsmaße für Expositionen und Outcomes .....             | 33 |
| 2.1.4 | Validität und Reliabilität .....                                 | 36 |
| 2.1.5 | Epidemiologische Studientypen .....                              | 37 |
| 2.1.6 | Klinische Studien .....                                          | 41 |
| 2.1.7 | Systematische Übersichten und Meta-Analysen .....                | 48 |
| 2.1.8 | Mögliche Fehlerquellen in epidemiologischen Untersuchungen ..... | 50 |
| 2.1.9 | Evidenzbasierte Medizin und Public Health .....                  | 56 |
| 2.2   | Demografie .....                                                 | 58 |
| 2.2.1 | Die Bevölkerung .....                                            | 58 |
| 2.2.2 | Entwicklung der Altersstruktur der Bevölkerung .....             | 60 |
| 2.2.3 | Sterbefälle und Mortalitätsraten .....                           | 62 |
| 2.2.4 | Lebenserwartung .....                                            | 63 |
| 2.2.5 | Todesursachen und potentiell verlorene Lebensjahre .....         | 65 |

|          |                                                                                           |     |
|----------|-------------------------------------------------------------------------------------------|-----|
| 2.3      | Biostatistik .....                                                                        | 66  |
| 2.3.1    | Warum brauchen wir Statistik? .....                                                       | 67  |
| 2.3.2    | Klassifikation von Daten .....                                                            | 68  |
| 2.3.3    | Transparentes Zusammenfassen der erhobenen Daten .....                                    | 69  |
| 2.3.4    | Variabilität des Mittelwertes bei wiederholten Zufalls-Stichproben ...                    | 73  |
| 2.3.5    | Die Normalverteilung in aller Kürze .....                                                 | 76  |
| 2.3.6    | Das 95%-Vertrauensintervall .....                                                         | 77  |
| 2.3.7    | Der Umgang mit Wahrscheinlichkeiten: Interpretation von<br>Untersuchungen und Tests ..... | 78  |
| 2.3.8    | Statistische Signifikanz und p-Wert .....                                                 | 80  |
| 2.3.9    | Statistische Signifikanz und klinische Relevanz .....                                     | 82  |
| 2.4      | Sozialwissenschaftliche Methoden der Datenerhebung .....                                  | 84  |
| 2.4.1    | Was ist eine gute Frage? .....                                                            | 84  |
| 2.4.2    | Was führt zu einer guten Antwort? .....                                                   | 85  |
| 2.4.3    | Quantitative Methoden zur Erhebung von Daten .....                                        | 87  |
| 2.4.4    | Qualitative Datenerhebungsverfahren .....                                                 | 90  |
| 2.5      | Gesundheitsökonomie .....                                                                 | 93  |
| 2.5.1    | Gesundheitsökonomische Studientypen .....                                                 | 94  |
| 2.5.2    | Kostenarten .....                                                                         | 97  |
| 2.5.3    | Die inkrementelle Betrachtungsweise bei gesundheitsökonomischen<br>Studien .....          | 98  |
| 2.5.4    | Die Interpretation gesundheitsökonomischer Studienergebnisse .....                        | 99  |
| <b>3</b> | <b>Gesundheitssysteme</b> .....                                                           |     |
| 3.1      | Einführung .....                                                                          | 101 |
| 3.1.1    | Definition und Ziele .....                                                                | 101 |
| 3.1.2    | Organisationsmodelle .....                                                                | 102 |
| 3.1.3    | Kosten und Qualität im internationalen Vergleich .....                                    | 104 |
| 3.2      | Das schweizerische Gesundheitssystem .....                                                | 107 |
| 3.2.1    | Rolle und Funktion des Staates .....                                                      | 107 |
| 3.2.2    | Organisation der medizinischen und pflegerischen Versorgung .....                         | 111 |
| 3.2.3    | Vergütungs- und Tarifsyste me .....                                                       | 113 |
| 3.2.4    | Finanzierung, Ausgaben und Inanspruchnahme<br>des Gesundheitssystems .....                | 115 |
| 3.3      | Das deutsche Gesundheitssystem .....                                                      | 117 |
| 3.3.1    | Rolle und Funktion des Staates .....                                                      | 117 |
| 3.3.2    | Organisation der medizinischen und pflegerischen Versorgung .....                         | 118 |
| 3.3.3    | Vergütungssysteme .....                                                                   | 120 |
| 3.3.4    | Finanzierung und Ausgaben des Gesundheitssystems .....                                    | 121 |
| 3.4      | Patientensicherheit .....                                                                 | 123 |
| <b>4</b> | <b>Prävention und Gesundheitsförderung</b> .....                                          |     |
| 4.1      | Grundlagen .....                                                                          | 127 |
| 4.2      | Prävention .....                                                                          | 130 |
| 4.2.1    | Verhaltensprävention .....                                                                | 132 |
| 4.2.2    | Verhältnisprävention .....                                                                | 134 |

|          |                                                                                            |     |
|----------|--------------------------------------------------------------------------------------------|-----|
| 4.2.3    | Sinnvolle Kombination von Verhaltens- und Verhältnisprävention . . . .                     | 135 |
| 4.3      | Gesundheitsförderung . . . . .                                                             | 136 |
| 4.4      | Gesundheitsverhalten und Lebensstile . . . . .                                             | 141 |
| 4.4.1    | Modelle des Gesundheitsverhaltens . . . . .                                                | 142 |
| 4.4.2    | Stress und Stressbewältigung . . . . .                                                     | 146 |
| 4.4.3    | Gesundheitsrelevante Lebensstile . . . . .                                                 | 149 |
| 4.4.4    | Gesundheitskompetenz . . . . .                                                             | 150 |
| 4.5      | Screening . . . . .                                                                        | 152 |
| 4.5.1    | Was ist Screening? . . . . .                                                               | 153 |
| 4.5.2    | Aussieben und aussortieren: Was Screening bewirkt . . . . .                                | 155 |
| 4.5.3    | Evaluation und ihre Fallstricke . . . . .                                                  | 159 |
| 4.5.4    | Screening-Programme . . . . .                                                              | 162 |
| 4.6      | Gesundheitsförderung und Prävention in der Arztpraxis . . . . .                            | 164 |
| 4.6.1    | Beratung . . . . .                                                                         | 166 |
| 4.6.2    | Periodische Gesundheitsuntersuchungen . . . . .                                            | 166 |
| 4.6.3    | Nachteile und Grenzen des Settings Arztpraxis . . . . .                                    | 169 |
| <b>5</b> | <b>Umwelt</b>                                                                              |     |
| 5.1      | Wasser . . . . .                                                                           | 171 |
| 5.1.1    | Die zentrale Bedeutung von Wasser und Abwasser<br>für die menschliche Gesundheit . . . . . | 171 |
| 5.1.2    | Krankheitserreger . . . . .                                                                | 172 |
| 5.1.3    | Chemische Verunreinigungen . . . . .                                                       | 173 |
| 5.1.4    | Trinkwasseraufbereitung und -kontrolle im<br>deutschsprachigen Raum . . . . .              | 174 |
| 5.2      | Luft . . . . .                                                                             | 175 |
| 5.2.1    | Schadstoffe und ihre Quellen – Emissionen und Immissionen . . . . .                        | 175 |
| 5.2.2    | Gesundheitliche Auswirkungen . . . . .                                                     | 177 |
| 5.2.3    | Luftverschmutzung und Prävention . . . . .                                                 | 181 |
| 5.2.4    | Luftverschmutzung, individuelles Risiko<br>und Public-Health-Bedeutung . . . . .           | 183 |
| 5.3      | Lärm . . . . .                                                                             | 183 |
| 5.3.1    | Definitionen und Maßeinheiten: Was sind Schall und Lärm? . . . . .                         | 184 |
| 5.3.2    | Lärmbelastung der Bevölkerung und Expositionsquellen . . . . .                             | 185 |
| 5.3.3    | Gesundheitsfolgen . . . . .                                                                | 185 |
| 5.3.4    | Public-Health-Auswirkungen . . . . .                                                       | 188 |
| 5.3.5    | Richtlinien und gesetzliche Regelungen . . . . .                                           | 188 |
| 5.4      | Strahlung . . . . .                                                                        | 189 |
| 5.4.1    | Nicht-ionisierende Strahlung . . . . .                                                     | 190 |
| 5.4.2    | Ionisierende Strahlung . . . . .                                                           | 193 |
| 5.5      | Klima . . . . .                                                                            | 200 |
| 5.5.1    | Natürliche und anthropogene Klimaveränderung . . . . .                                     | 200 |
| 5.5.2    | Klimatische und ökologische Folgen des Klimawandels . . . . .                              | 202 |
| 5.5.3    | Gesundheitsfolgen . . . . .                                                                | 202 |
| 5.5.4    | Klimapolitik . . . . .                                                                     | 205 |

## 6 Arbeit und Gesundheit

|       |                                                                                                        |     |
|-------|--------------------------------------------------------------------------------------------------------|-----|
| 6.1   | Berufsbezogene und berufsbedingte Gesundheitsschädigungen . . . . .                                    | 208 |
| 6.1.1 | Definitionen und Häufigkeiten berufsbezogener<br>und berufsbedingter Gesundheitsschädigungen . . . . . | 208 |
| 6.1.2 | Gesetze zu Arbeit und Gesundheit in der Schweiz . . . . .                                              | 209 |
| 6.1.3 | Grenzwerte am Arbeitsplatz . . . . .                                                                   | 210 |
| 6.1.4 | Vorgehen bei Verdacht auf eine berufsbezogene<br>bzw. berufsbedingte Erkrankung . . . . .              | 213 |
| 6.1.5 | Weitere Berufsfelder im Bereich Gesundheit und Arbeit . . . . .                                        | 213 |
| 6.2   | Berufskrankheiten . . . . .                                                                            | 214 |
| 6.2.1 | Die wichtigsten Schädigungsmechanismen bei Berufskrankheiten . . . .                                   | 215 |
| 6.2.2 | Die Liste schädigender Stoffe und arbeitsbedingter<br>Erkrankungen nach dem UVG . . . . .              | 220 |
| 6.2.3 | Physikalische Einwirkungen und Berufsunfälle . . . . .                                                 | 220 |
| 6.2.4 | Arbeitsmedizinische Vorsorge und Betreuung . . . . .                                                   | 221 |
| 6.3   | Berufsbezogene Gesundheitsrisiken . . . . .                                                            | 222 |
| 6.3.1 | Stress am Arbeitsplatz . . . . .                                                                       | 222 |
| 6.3.2 | Rückenschmerzen . . . . .                                                                              | 225 |
| 6.4   | Arbeit und Gesundheit in Deutschland . . . . .                                                         | 227 |
| 6.4.1 | Die Gesetzliche Unfallversicherung in Deutschland . . . . .                                            | 227 |
| 6.4.2 | Berufskrankheiten . . . . .                                                                            | 228 |
| 6.4.3 | Arbeitsschutz . . . . .                                                                                | 228 |
| 6.5   | Betriebliches Gesundheitsmanagement . . . . .                                                          | 231 |

## 7 Chronische Krankheiten und Unfälle

|       |                                                                                                |     |
|-------|------------------------------------------------------------------------------------------------|-----|
| 7.1   | Herz-Kreislauf-Krankheiten . . . . .                                                           | 237 |
| 7.1.1 | Epidemiologische Daten . . . . .                                                               | 238 |
| 7.1.2 | Risiko- und Schutzfaktoren . . . . .                                                           | 241 |
| 7.1.3 | Prävention . . . . .                                                                           | 244 |
| 7.2   | Bösartige Tumore . . . . .                                                                     | 246 |
| 7.2.1 | Krebs in Deutschland und in der Schweiz . . . . .                                              | 247 |
| 7.2.2 | Überlebensraten nach Krebsdiagnose . . . . .                                                   | 249 |
| 7.2.3 | Risikofaktoren und Prävention . . . . .                                                        | 249 |
| 7.2.4 | Krebsfrüherkennung . . . . .                                                                   | 251 |
| 7.3   | Erkrankungen des Bewegungsapparates . . . . .                                                  | 253 |
| 7.3.1 | Rückenschmerzen . . . . .                                                                      | 253 |
| 7.3.2 | Arthrose . . . . .                                                                             | 255 |
| 7.3.3 | Osteoporose . . . . .                                                                          | 256 |
| 7.3.4 | Rheumatoide Arthritis . . . . .                                                                | 258 |
| 7.4   | Adipositas . . . . .                                                                           | 259 |
| 7.4.1 | Definitionen . . . . .                                                                         | 259 |
| 7.4.2 | Epidemiologische Daten . . . . .                                                               | 260 |
| 7.4.3 | Ursachen und Risikofaktoren . . . . .                                                          | 261 |
| 7.4.4 | Folge- und Begleiterkrankungen . . . . .                                                       | 262 |
| 7.4.5 | Gesundheitskosten aufgrund von Übergewicht/Adipositas<br>und ihren Folgeerkrankungen . . . . . | 263 |

|       |                                                                                                          |     |
|-------|----------------------------------------------------------------------------------------------------------|-----|
| 7.4.6 | Prävention                                                                                               | 264 |
| 7.4.7 | Therapie                                                                                                 | 264 |
| 7.5   | Diabetes mellitus und seine Folgeerkrankungen                                                            | 265 |
| 7.5.1 | Epidemiologie                                                                                            | 266 |
| 7.5.2 | Ursachen und Risikofaktoren                                                                              | 267 |
| 7.5.3 | Folge- und Begleiterkrankungen                                                                           | 268 |
| 7.5.4 | Gesundheitskosten                                                                                        | 268 |
| 7.5.5 | Diabetes-Prävention                                                                                      | 269 |
| 7.5.6 | Diabetes-Therapie                                                                                        | 270 |
| 7.6   | Atemwegserkrankungen und Allergien                                                                       | 270 |
| 7.6.1 | Der Respirationstrakt im Laufe des Lebens                                                                | 271 |
| 7.6.2 | Epidemiologie der Erkrankungen der Atemwege                                                              | 273 |
| 7.6.3 | Risikofaktoren für Atemwegserkrankungen                                                                  | 273 |
| 7.6.4 | Asthma und COPD als Beispiele chronischer Atemwegserkrankungen                                           | 274 |
| 7.7   | Psychische Störungen, Sucht und Suizid                                                                   | 277 |
| 7.7.1 | Epidemiologie psychischer Störungen und Suchterkrankungen                                                | 278 |
| 7.7.2 | Ursachen und Risikofaktoren bei psychischen Störungen<br>und Suchterkrankungen                           | 281 |
| 7.7.3 | Therapeutische Ansatzpunkte und präventive Strategien<br>bei psychischen Störungen und Suchterkrankungen | 282 |
| 7.8   | Unfälle                                                                                                  | 284 |
| 7.8.1 | Epidemiologische Daten                                                                                   | 284 |
| 7.8.2 | Risikofaktoren                                                                                           | 286 |
| 7.8.3 | Prävention                                                                                               | 287 |

## 8 Infektionskrankheiten

|       |                                                                                 |     |
|-------|---------------------------------------------------------------------------------|-----|
| 8.1   | Allgemeine Konzepte                                                             | 291 |
| 8.1.1 | Merkmale einer Infektionskrankheit                                              | 291 |
| 8.1.2 | Übertragungswege und Übertragungsdynamik                                        | 293 |
| 8.1.3 | Epidemie                                                                        | 294 |
| 8.2   | Überwachung                                                                     | 298 |
| 8.2.1 | Ziele der Überwachung                                                           | 298 |
| 8.2.2 | Gesetzliche Grundlagen und Rahmenbedingungen                                    | 299 |
| 8.2.3 | Methodik und Meldesysteme                                                       | 300 |
| 8.3   | Epidemiologie wichtiger Infektionskrankheiten                                   | 302 |
| 8.3.1 | Mortalität und Morbidität infolge von Infektionskrankheiten                     | 302 |
| 8.3.2 | Global bedeutende Infektionskrankheiten am Beispiel von Malaria<br>und HIV/AIDS | 303 |
| 8.3.3 | Neue Infektionskrankheiten                                                      | 306 |
| 8.3.4 | Zoonosen und vektorübertragene Infektionskrankheiten                            | 308 |
| 8.3.5 | Nosokomiale Infektionen                                                         | 311 |
| 8.3.6 | Antibiotikaresistenz                                                            | 314 |
| 8.3.7 | Reisemedizin                                                                    | 317 |
| 8.4   | Impfungen und andere präventive Maßnahmen                                       | 320 |
| 8.4.1 | Impfungen                                                                       | 320 |
| 8.4.2 | Chemoprophylaxe                                                                 | 324 |
| 8.4.3 | Expositionsprophylaxe                                                           | 326 |

|          |                                                                 |     |
|----------|-----------------------------------------------------------------|-----|
| <b>9</b> | <b>Globale Gesundheit</b>                                       |     |
| 9.1      | Internationale Vergleiche                                       | 331 |
| 9.1.1    | Klassifizierung der Länder nach Einkommen und Entwicklung       | 331 |
| 9.1.2    | Gesundheitsindikatoren                                          | 334 |
| 9.1.3    | Kinder- und Säuglingssterblichkeit                              | 335 |
| 9.1.4    | Mortalität und Morbidität im Erwachsenenalter                   | 338 |
| 9.1.5    | Die weltweit wichtigsten Ursachen der Krankheitslast            | 341 |
| 9.2      | Determinanten der globalen Gesundheit                           | 343 |
| 9.2.1    | Armut                                                           | 343 |
| 9.2.2    | Hunger                                                          | 344 |
| 9.2.3    | Bildung                                                         | 344 |
| 9.2.4    | Ungleichheit zwischen den Geschlechtern                         | 345 |
| 9.2.5    | Kriegerische Konflikte                                          | 345 |
| 9.2.6    | Umweltveränderungen                                             | 346 |
| 9.3      | Health for All: Strategien, Akteure und Setzung von Prioritäten | 346 |
| 9.3.1    | Millennium-Entwicklungsziele                                    | 347 |
| 9.3.2    | Globaler Fonds, Stiftungen und Initiativen                      | 347 |
| 9.3.3    | Die WHO und andere internationale Organisationen                | 348 |
| Index    |                                                                 | 351 |
